# Supplementary material
Source: MDPI journal article supplement (https://www.mdpi.com/2071-1050/13/23/13253)
Supplement: s1 [file s1]

## Online supplementary materials

**Table S1. – List of funds.**

| <b>Funds</b>              | <b>ESG rating (n. of globes)</b> |
|---------------------------|----------------------------------|
| BNP Europe Value          | 1                                |
| Odey Pan EUR              | 1                                |
| Capital Group             | 2                                |
| Candriam Equities         | 2                                |
| Anima                     | 2                                |
| Amundi Index MSCI EUR     | 2                                |
| Amundi Funds Top EUR      | 2                                |
| Allianz                   | 2                                |
| Amundi AZ                 | 2                                |
| Amundi SF                 | 2                                |
| BNP Europe Equity         | 3                                |
| GAM Star                  | 3                                |
| Candriam L. C             | 3                                |
| Candriam L. N             | 3                                |
| CPR Silver age            | 3                                |
| Azimut                    | 3                                |
| DPAM                      | 3                                |
| BNP Action Croissance     | 4                                |
| Candriam optimum          | 4                                |
| BL Equities               | 4                                |
| BMO                       | 4                                |
| Janus                     | 4                                |
| New Capital               | 4                                |
| GAM Equity                | 4                                |
| Comgest Growth            | 5                                |
| Echiquier Major           | 5                                |
| Fidelity Active Strategy  | 5                                |
| Sailern International Eur | 5                                |
| BlackRock Eur focus       | 5                                |
| Pictec                    | 5                                |
| MSCI Europe               |                                  |

**Table S2. – Akaike information criterion.**

| Funds                     | GARCH(1,1) |         | GARCH(1,1)/t(3) |         | GARCH(1,1)/GED(2) |         | GARCH(1,1)/GED (3) |         |
|---------------------------|------------|---------|-----------------|---------|-------------------|---------|--------------------|---------|
|                           | AIC        | BIC     | AIC             | BIC     | AIC               | BIC     | AIC                | BIC     |
| BNP Europe Value          | -9 453     | -9 432  | -9 549          | -9 528  | -9 453            | -9 432  | -9 160             | -9 160  |
| Odey Pan EUR              | -10 411    | -10 390 | -10 479         | -10 457 | -10 411           | -10 390 | -10 156            | -10 134 |
| Capital Group             | -10 021    | -9 999  | -10 116         | -10 095 | -10 021           | -9 999  | -9 749             | -9 728  |
| Candriam Equities         | -9 819     | -9 798  | -9 882          | -9 861  | -9 819            | -9 798  | -9 576             | -9 555  |
| Anima                     | -9 828     | -9 807  | -9 939          | -9 917  | -9 828            | -9 807  | -9 541             | -9 520  |
| Amundi Index MSCI EUR     | -9 867     | -9 845  | -9 965          | -9 943  | -9 867            | -9 845  | -9 606             | -9 585  |
| Amundi Funds Top EUR      | -9 739     | -9 718  | -9 804          | -9 782  | -9 739            | -9 718  | -9 490             | -9 469  |
| Allianz                   | -9 917     | -9 896  | -10 081         | -10 060 | -9 917            | -9 896  | -9 608             | -9 587  |
| Amundi AZ                 | -9 781     | -9 760  | -9 872          | -9 851  | -9 781            | -9 760  | -9 507             | -9 486  |
| Amundi SF                 | -9 835     | -9 814  | -9 915          | -9 893  | -9 835            | -9 814  | -9 577             | -9 555  |
| BNP Europe Equity         | -9 713     | -9 681  | -9 770          | -9 749  | -9 713            | -9 691  | -9 481             | -9 460  |
| GAM Star                  | -9 745     | -9 724  | -9 815          | -9 793  | -9 745            | -9 724  | -9 484             | -9 463  |
| Candriam L. C             | -9 917     | -9 895  | -9 916          | -9 895  | -9 917            | -9 895  | -9 747             | -9 725  |
| Candriam L. N             | -9 017     | -9 896  | -9 916          | -9 895  | -9 917            | -9 896  | -9 746             | -9 725  |
| CPR Silver Age            | -8 763     | -8 742  | -8 837          | -8 816  | -8 763            | -8 742  | -8 543             | -8 523  |
| Azimut                    | -9 971     | -9 949  | -10 094         | -10 073 | -9 971            | -9 949  | -9 677             | -9 656  |
| DPAM                      | -9 869     | -9 847  | -9 917          | -9 896  | -9 869            | -9 847  | -9 656             | -9 635  |
| BNP Action Croissance     | -9 971     | -9 950  | -10 249         | -10 228 | -9 971            | -9 950  | -9 549             | -9 528  |
| Candriam optimum          | -10 452    | -10 431 | -10 507         | -10 486 | -10 452           | -10 431 | -10 227            | -10 206 |
| BL Equities               | -10 052    | -10 031 | -10 082         | -10 061 | -10 052           | -10 031 | -9 850             | -9 829  |
| BMO                       | -9 802     | -9 781  | -9 914          | -9 893  | -9 802            | -9 781  | -9 487             | -9 466  |
| Janus                     | -7 432     | -7 417  | -7 513          | -7 493  | -7 437            | -7 417  | -7 243             | -7 223  |
| New Capital               | -5 425     | -5 406  | -5 529          | -5 510  | -5 425            | -5 406  | -5 246             | -5 227  |
| GAM Equity                | -9 737     | -9 716  | -9 812          | -9 791  | -9 737            | -9 716  | -9 473             | -9 452  |
| Comgest Growth            | -10 079    | -10 058 | -10 133         | -10 112 | -10 079           | -10 058 | -9 860             | -9 838  |
| Echiquier Major           | -9 975     | -9 954  | -10 009         | -9 988  | -9 975            | -9 954  | -9 783             | -9 761  |
| Fidelity Active Strategy  | -9 868     | -9 847  | -9 876          | -9 854  | -9 868            | -9 847  | -9 674             | -9 653  |
| Sailern International Eur | -10 120    | -10 098 | -10 171         | -10 150 | -10 120           | -10 098 | -9 894             | -9 873  |
| Black Rock Eur focus      | -9 759     | -9 738  | -9824           | -9 802  | -9 759            | -9 738  | -9 520             | -9 499  |
| Pictec                    | -10 0153   | -10 132 | -10 246         | -10 224 | -10 153           | -10 132 | -9 898             | -9 876  |
| MSCI Europe               | -10 044    | -10 022 | -10 115         | -10 094 | -9 798            | -9 777  | -10 044            | -10 022 |
